# Supplementary material for: Applying alloyed metal nanoparticles to enhance solar assisted water splitting
Source: Royal Society of Chemistry journal article supplement (doi:10.1039/c4ra08216h), 2014-09-10
Supplement: c4ra08216h1.pdf [file c4ra08216h1.pdf]

## Supporting Information

### Applying Alloyed Metal Nanoparticles to Enhance Solar Assisted Water Splitting

*Naimeh Naseri\**, *Parvaneh Sangpour*, *Hossein Mousavi*

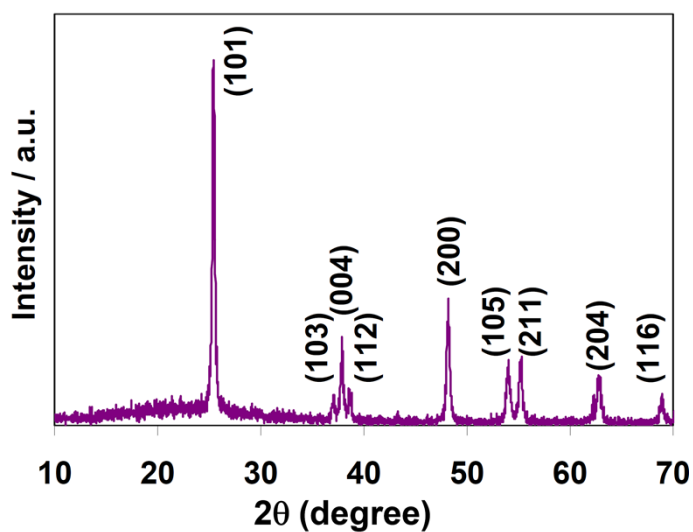

**Figure S1.** XRD spectra of the annealed TiO<sub>2</sub> samples representing formation of anatase crystalline phase with an average size of 22 nm obtained from Scherrer equation.

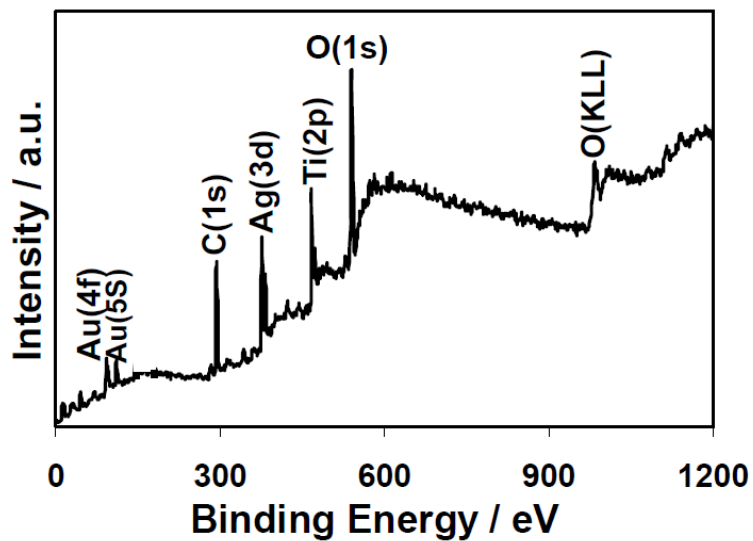

Figure S2. XPS survey spectra of the annealed GSANPS-TiO<sub>2</sub> films.

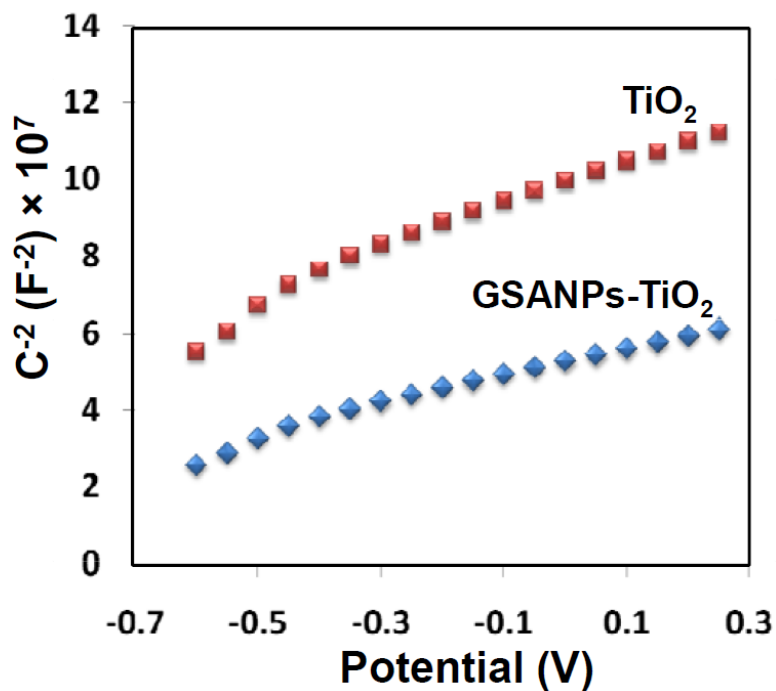

Figure S3. Mott-schottky plots of the prepared TiO<sub>2</sub> and GSANPS-TiO<sub>2</sub> photoanodes in a frequency of 1 kHz.
